# Supplementary material for: Protection of Erythrocytes and Microvascular Endothelial Cells against Oxidative Damage by Fragaria vesca L. and Rubus idaeus L. Leaves Extracts—The Mechanism of Action
Source: MDPI journal article supplement (doi:10.3390/molecules27185865), 2022-09-10
Supplement: s1 [file s1]

## Protection of Erythrocytes and Microvascular Endothelial Cells against Oxidative Damage by *Fragaria vesca* L. and *Rubus idaeus* L. Leaves Extracts — The Mechanism of Action

Sylwia Cyboran-Mikołajczyk, Katarzyna Męczarska, Katarzyna Solarska-Ściuk, Katarzyna Ratajczak-Wielgomas, Jan Oszmiański, Vera Jencova and Dorota Bonarska-Kujawa

### Supplementary Materials

**Table S1.** The content [mg/g] and characterization of phenolic compounds of the *Rubus L.* leaf preparation of using their spectral characteristic in UPLC-DAD (retention time,  $\lambda_{\max}$ ) and negative ions in UPLC-ESI-MS.

| Compounds                                              | Content [mg/g] | R <sub>t</sub> (min) | $\lambda_{\max}$ (nm) | [MS-]     | [MS-MS-]                   |
|--------------------------------------------------------|----------------|----------------------|-----------------------|-----------|----------------------------|
| 1. Neochlorogenic acid                                 | 5.05           | 2.34                 | 323                   | 353.0866  | 235.9249/191.0553/146.9378 |
| 2. Ellagitannins Lambertianin C                        | 267.98         | 5.12                 | 240                   | 1401.3730 | 633.075                    |
| 3. Ellagitannins hex (casuarinin)                      | 592.55         | 5.59                 | 240                   | 935.0760  | 633.075/ 300.9999          |
| 4. Quercetin-3-O-rutinoside                            | 8.78           | 6.37                 | 352                   | 609.1080  | 301.0350                   |
| 5. Ellagic acid                                        | 3.00           | 6.60                 | 364                   | 301.000   |                            |
| 6. Quercetin-3-O-rutinoside                            | 2.25           | 6.98                 | 354                   | 609.1427  | 463.0397/301.0277/151.0034 |
| 7. Quercetin-3-O-galactoside                           | 2.20           | 7.14                 | 353                   | 463.0843  | 301.0277/151.0034          |
| 8. Quercetin -3-O-glucuronide                          | 15.12          | 7.27                 | 351                   | 477.0670  | 301.0277/151.0034          |
| 9. Quercetin-3-O-glucoside                             | 6.60           | 7.37                 | 352                   | 463.0843  | 301.0277/151.0034          |
| 10. Kaempferol-3-O-rutinoside                          | 9.19           | 7.48                 | 350                   | 593.1559  | 447.0968/285.0187          |
| 11. Luteolino-3-O-glucoronide                          | 2.74           | 7.54                 | 340                   | 461.0710  | 285.0187                   |
| 12. Kaempferol-3-O-glucoside                           | 1.68           | 8.05                 | 346                   | 447.0916  | 285.0313/229.0230          |
| 13. Kaempferol-3-O-glucoside-rhamnoside-7-O-rhamnoside | 1.34           | 8.28                 | 346                   | 739.1930  | 593.1559                   |
| 14. Kaempferol-3-O-glucoside-7-O-rhamnoside            | 1.47           | 8.38                 | 346                   | 593.1559  | 431.0968/285.0187          |
| 15. Kaempferol -3-O-glucuronide                        | 2.24           | 8.51                 | 346                   | 461.0710  | 285.0187                   |
| 16. Quercetin-3-O-6-acetylglucoside                    | 1.36           | 8.85                 | 350                   | 505.0980  | 447.0397/301.0277/151.0034 |
| 17. Apigenin-3-O-glucoronide                           | 7.88           | 8.95                 | 338                   | 445.0710  | 269.0450                   |
| <b>Total</b>                                           | <b>931.43</b>  |                      |                       |           |                            |

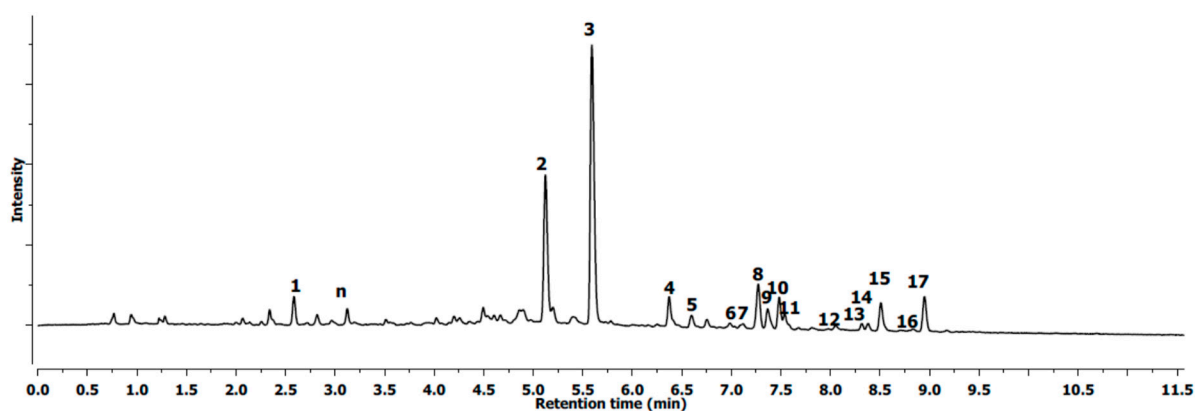

**Figure S1.** UPLC-UV max plot chromatograms of phenolic compounds of the *Rubus L.* leaf preparation (refer to Table 1 for the identification of time retention peaks).

**Table S2.** The content [mg/g] and characterization of phenolic compounds of the *Fragaria vesca L.* preparation of using their spectral characteristic in UPLC-DAD (retention time,  $\lambda_{\max}$ ) and negative ions in UPLC-ESI-MS.

| Compounds                                     | Content [mg/g] | R <sub>t</sub> (min) | $\lambda_{\max}$ (nm) | [MS-]    | [MS-MS-]                   |
|-----------------------------------------------|----------------|----------------------|-----------------------|----------|----------------------------|
| 1.Chlorogenic acid                            | 1.22           | 4.69                 | 323                   | 353.0866 | 235.9249/191.0553/146.9378 |
| 2. Quercetin-3-O-glucoside- glucuronide       | 3.44           | 5.69                 | 352                   | 639.1190 |                            |
| 3.p-Coumaroylquinc acid                       | 0.41           | 6.05                 | 312                   | 337.0560 |                            |
| 4. Quercetin-3-O-rutinoside                   | 26.62          | 6.32                 | 352                   | 609.1080 | 447.0916/301.0277/151.0034 |
| 5.Ellagic acid                                | 2.21           | 6.54                 | 364                   | 301.000  |                            |
| 6.Kaempferol-3-O-glucoside- glucuronide       | 2.32           | 6.60                 | 354                   | 623.123  | 447.0968/285.0313/229.0230 |
| 7. Ellagitannins hex (casuarinin)             | 483.33         | 6.85                 | 245                   | 934.0707 | 783.069/633.075/ 300.9999  |
| 8. Quercetin -3-O-glucuronide                 | 5.37           | 7.21                 | 351                   | 477.0670 | 301.0277/151.0034          |
| 9.Kaempferol 3-O-rhamnoside-7-O-galacturonide | 18.03          | 7.30                 | 345                   | 607,1290 | 285.0313                   |
| 10.Kaempferol-3-O-rutinoside                  | 37.92          | 7.42                 | 350                   | 593.1559 | 447.0968/285.0187          |
| 11.Kaempferol -3-O-glucuronide                | 0.27           | 8.44                 | 346                   | 461.0710 | 285.0187                   |
| 12.Isorhamnetin-3-O-rhamnoside                | 0.74           | 8.63                 | 370                   | 461.0720 | 315.0140                   |
| <b>Total</b>                                  | <b>581.88</b>  |                      |                       |          |                            |

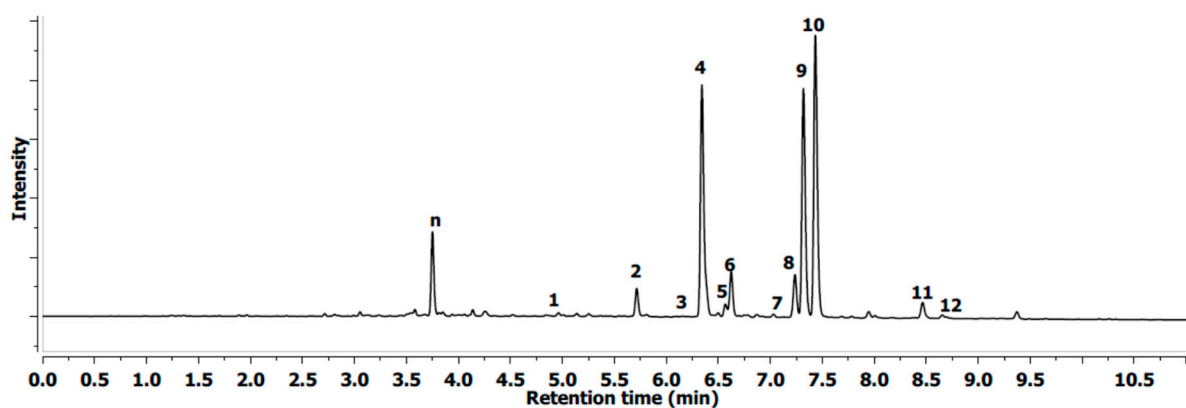

**Figure S2.** UPLC-UV 360 nm chromatogram of phenolic compounds of the *Fragaria vesca L.* leaf preparation (refer to Table 1 for the identification of time retention peaks).
